# Supplementary material
Source: HighWire-hosted journal article supplement (doi:10.1101/rna.031898.111)
Supplement: Supp_File_2.xlsx [file Supp_File_2.xlsx]

## Sheet: PCR Calculator 1.0
		PCR Calculator 1.0
		Developed by John VanCuylenberg & Traude Beilharz
		Input:
			User Input	Status
		Base pairs per DNA molecule		0
		PCR Cycles		0
		Post-PCR mass (μg)		0
		Cycle Efficiency (%)		0
		Base pair mass (μg/base pair)	1.07934e-15	1
		Output:
			Pre-PCR	Post-PCR
		DNA molecules
		Base pairs
		Mass (μg)
